# Supplementary material
Source: PubMed Central journal article supplement (PMC3387689)
Supplement: supp_pp.111.191726_197126Supplemental_Data.pdf [file supp_pp.111.191726_197126Supplemental_Data.pdf]

## Supplemental Data

### Analysis of Arabidopsis *glucose insensitive growth* Mutants Reveals Involvement of the Plastidial Copper Transporter PAA1 in Glucose-induced Intracellular Signaling

Lee et al.

**Supplemental Figure S1.** Analysis of the stem cell niche in Col-0 and *gig* roots. Cell type-specific markers were used to monitor defects in and around the stem cell niche. A, *pSHR::SHR-GFP*. B, *pSCR::GFP-SCR*. C, *QC25::GUS*. D, *pWOX5::GFP*.

**Supplemental Figure S2.** Comparative analysis of Col-0 and *gig* adult plants. A, Top view. B, Side view. Rosette leaves of *gig* are smaller and inflorescence stems of *gig* are shorter than those of Col-0. F<sub>1</sub> progeny of crosses between Col-0 and *gig* (Col-0 x *gig*) are indistinguishably similar to Col-0.

**Supplemental Figure S3.** Complementation of *gig* with Cu supplementation. A, DIC image of root meristem size of Col-0 and *gig* at 8 DAG in the presence of 10  $\mu$ M CuSO<sub>4</sub>. Black arrowheads indicate the QC, whereas blue arrowheads demarcate the upper border of the MZ. Measurements of meristem cortex cell number (B) and meristem length (C) from 2 to 10 DAG in the presence of 10  $\mu$ M CuSO<sub>4</sub>.

**Supplemental Figure S4.** Root growth assay in the absence or presence of Cu with increasing Glc concentrations. Twelve-day-old seedlings of Col-0 (blue) and *gig* (red) were grown on MS agar plates without (A) and with 10 $\mu$ M CuSO<sub>4</sub> (B). Error bars indicate the SE of mean from biological triplicates.

**Supplemental Figure S5.** Expression analysis of Glc-responsive genes with the addition of Cu. qRT-PCR in Col-0 and *gig* in the presence of 1% (blue) and 6% (red) Glc with 10  $\mu$ M CuSO<sub>4</sub>. A, *APL3*. B, *HXK1*. C, *ABI4*. Statistical significance of differences was determined by Student's *t*-test (asterisk for *P*<0.05). Error bars indicate the SE of mean from biological triplicates.

**Supplemental Figure S6.** Prediction of an ABRE sequence in the *GIG* promoter. The combination of a CCAC/ACGT core element that is known for both ABI4 binding and retrograde signaling is underlined.

**Supplemental Table S1.** Sequence information of PCR primers used in this study

| Purpose                       | Name        |                                | Sequence (5'–3')              |
|-------------------------------|-------------|--------------------------------|-------------------------------|
| TAIL-PCR                      | AD2         |                                | NGTCGASWGANAWGAA              |
|                               | AD5         |                                | SSTGGSTANATWATWCT             |
|                               | LB50        |                                | ATAATAACGCTGCGGACATCT         |
|                               | LB100       |                                | CCTATAAATACGACGGATCGT         |
|                               | LB150       |                                | CACGTCGAAATAAAGATTTCCGA       |
| Genotyping                    | gig-1       | LP                             | ACCTTGTCAACCAACTGCTG          |
|                               |             | RP                             | GGTATGTAGTAGCTGCGTCT          |
|                               | pSKI015     | RB1                            | CTAGATCCGAAACTATCAGTG         |
|                               | gig-2       | LP                             | AACCCTCTCAAGACCAAGAGC         |
|                               |             | RP                             | ATTGGGCTGTAGGCATAAACC         |
|                               | SALK_070739 | LP                             | TTGTTTTTGATTCCAAATCGG         |
| RP                            |             | TCATCAAATGAGGAGGAATCG          |                               |
| SALK                          | LB          | GGCAATCAGCTGTTGCCCGTCTCACTGGTG |                               |
| abi4-1                        | F           | GGACCCCTTAGCTTCCCAAC           |                               |
|                               | R           | CGGATCCAGACCCATAGAAC           |                               |
| pGIG::GUS                     | pGIG        | F                              | CACCAGAACAAGAAAATACTTATCCGAGC |
|                               |             | R                              | GAAAGTGGGTGGCTCCGTA           |
| pGIG::GIG-GFP                 | pGIG<br>GIG | F                              | CACCAGAACAAGAAAATACTTATCCGAGC |
|                               |             | R                              | AGAGCTTTGCTTCCATCTTG TG       |
| Transient<br>expression assay | pGIG        | F                              | AAGCTTAGAACAAGAAAATACTTATCCG  |
|                               |             | R                              | TCTAGAGAAAGTGGGTGGCTCCGTA     |
| ABI4                          | ABI4        | F                              | TCTAGAATGGACCCCTTAGCTTCCCAAC  |
|                               |             | R                              | GAGCTCTTAATAGAATCCCCCAAGATGG  |
| qRT-PCR                       | ACT2        | F                              | TCGCTGACCGTATGAGCAAAGAA       |
|                               |             | R                              | TGGAATGTGCTGAGGGAAGCA         |
|                               | GIG         | F                              | GGGCTCTCATGGGTGTAAGCTC        |
|                               |             | R                              | TCCCTCTTTTGGTTCCGGTTTG        |
|                               | APL3        | F                              | CCAAACCGAATCTGAGATCGC         |
|                               |             | R                              | TCCTTCCTCTGGCCTATCAGC         |
|                               | CHS         | F                              | TGATGGTGCCATAGACGGAC          |
|                               |             | R                              | AGGATCGCTGGACCTCCAGG          |
| HXK1                          | F           | AGTGAGTGTATGGAGAGCTCAC         |                               |
|                               | R           | AGAGTGAGAAGCAGCAAGAAGCG        |                               |
| ABI4                          | F           | TCGTTTCATCATGAGGTGGCG          |                               |
|                               | R           | CGGATCCAGACCCATAGAAC           |                               |
| ABI3                          | F           | CAATGGGCTCCAAGAAGGTG           |                               |
|                               | R           | TCTCTTCGTAGCTGCTGACG           |                               |
| ABI5                          | F           | TGATCAAGAACCGCGAGTCTGC         |                               |
|                               | R           | TGTGCCCTTGACTTCAAACCTCTC       |                               |

**Supplemental Figure S1.**

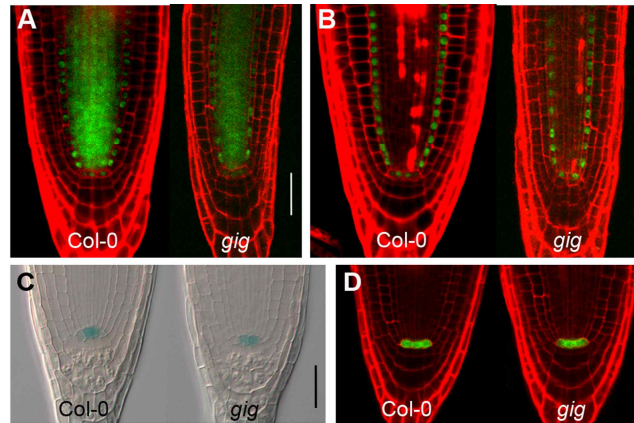

**Supplemental Figure S1.** Analysis of the stem cell niche in Col-0 and *gig* roots. Cell type-specific markers were used to monitor defects in and around the stem cell niche. A, *pSHR::SHR-GFP*. B, *pSCR::GFP-SCR*. C, *QC25::GUS*. D, *pWOX5::GFP*.

**Supplemental Figure S2.**

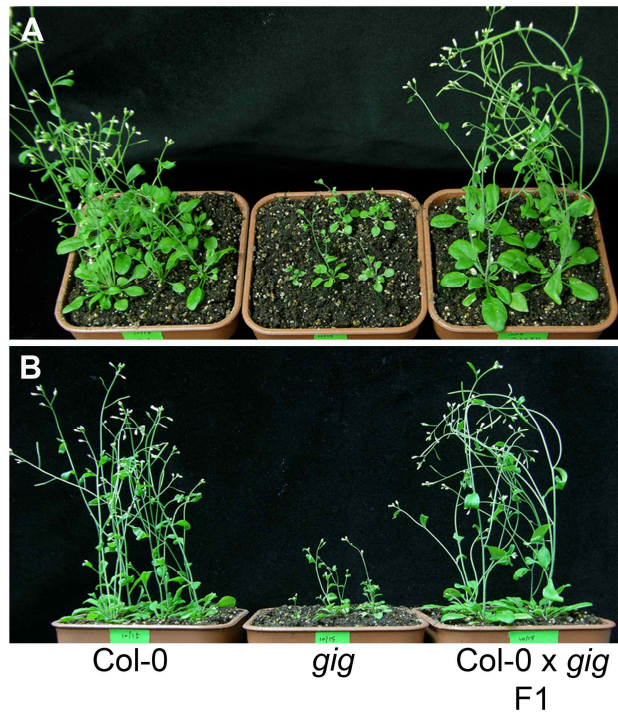

**Supplemental Figure S2.** Comparative analysis of Col-0 and *gig* adult plants. A, Top view. B, Side view. Rosette leaves of *gig* are smaller and inflorescence stems of *gig* are shorter than those of Col-0. F<sub>1</sub> progeny of crosses between Col-0 and *gig* (Col-0 x *gig*) are indistinguishably similar to Col-0.

### Supplemental Figure S3.

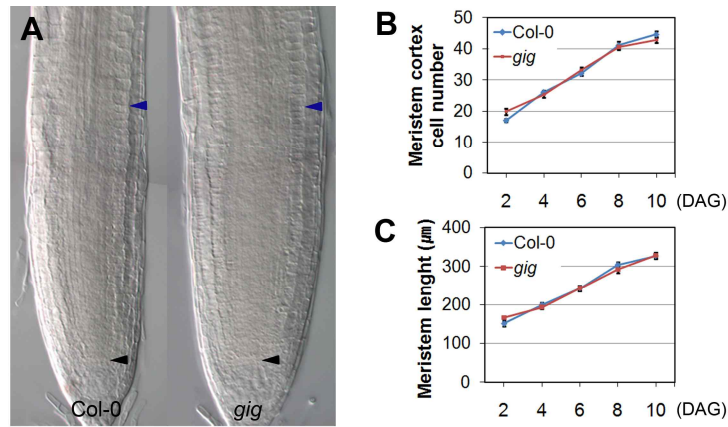

**Supplemental Figure S3.** Complementation of *gig* with Cu supplementation. A, DIC image of root meristem size of Col-0 and *gig* at 8 DAG in the presence of 10 µM CuSO<sub>4</sub>. Black arrowheads indicate the QC, whereas blue arrowheads demarcate the upper border of the MZ. Measurement of meristem cortex cell number (B) and meristem length (C) from 2 to 10 DAG in the presence of 10 µM CuSO<sub>4</sub>.

### Supplemental Figure S4.

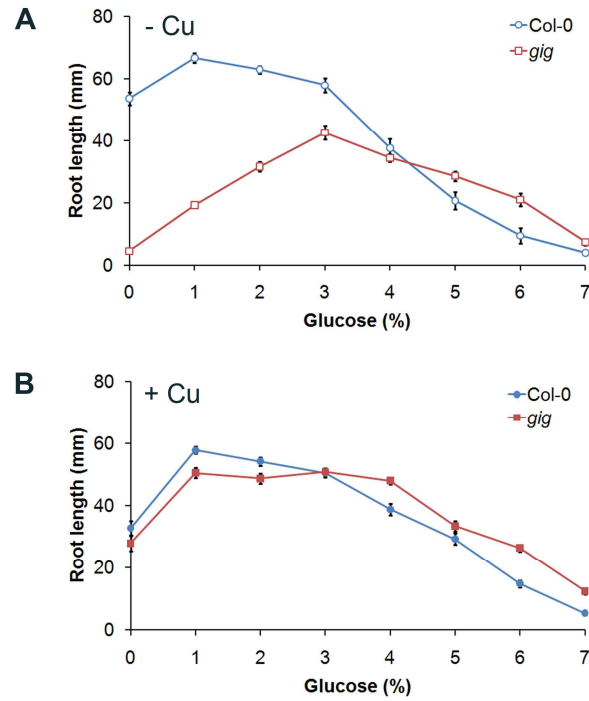

**Supplemental Figure S4.** Root growth assay in the absence or presence of Cu with increasing Glc concentrations. Twelve-day-old seedlings of Col-0 (blue) and *gig* (red) were grown on MS agar plates without (A) and with 10 $\mu$ M CuSO<sub>4</sub> (B). Error bars indicate the SE of mean from biological triplicates.

## Supplemental Figure S5.

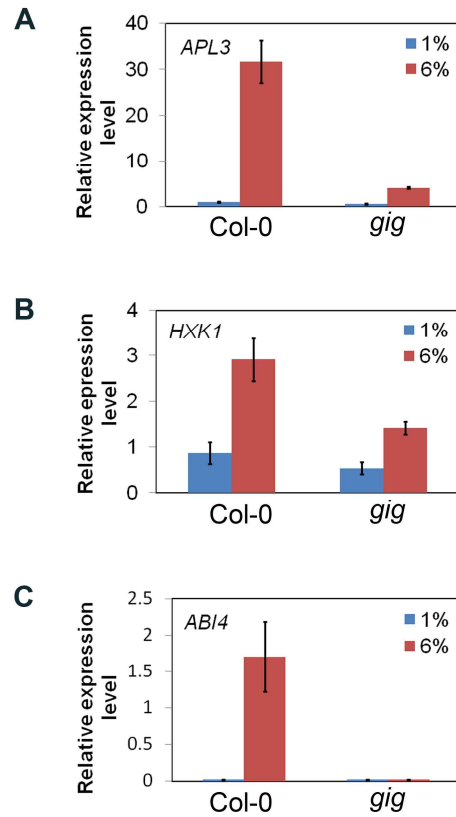

**Supplemental Figure S5.** Expression analysis of Glc-responsive genes with the addition of Cu. qRT-PCR in Col-0 and *gig* in the presence of 1% (blue) and 6% (red) Glc with 10  $\mu$ M CuSO<sub>4</sub>. A, *APL3*. B, *HXK1*. C, *ABI4*. Statistical significance of differences was determined by Student's *t*-test (asterisk for  $P < 0.05$ ). Error bars indicate the SE of mean from biological triplicates.



**Supplemental Figure S6.**

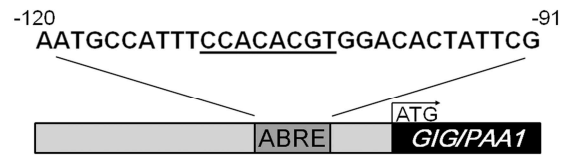

**Supplemental Figure S6.** Prediction of an ABRE sequence in the *GIG* promoter. The combination of a CCAC/ACGT core element that is known for both ABI4 binding and retrograde signaling is underlined.
